# Supplementary material for: Metabolic phenotyping for monitoring ovarian cancer patients
Source: PubMed Central journal article supplement (PMC4800393; doi:10.1038/srep23334), 2016-03-21
Supplement: srep23334-s1.pdf [file srep23334-s1.pdf]

## Supplementary materials

### Metabolic phenotyping for monitoring ovarian cancer patients

Chaofu Ke<sup>a</sup>, Ang Li<sup>a</sup>, Yan Hou<sup>a</sup>, Meng Sun<sup>b</sup>, Kai Yang<sup>a</sup>, Jinlong Cheng<sup>c</sup>, Jingtao Wang<sup>a</sup>, Tingting Ge<sup>c</sup>, Fan Zhang<sup>a</sup>, Qiang Li<sup>a</sup>, Junnan Li<sup>a</sup>, Ying Wu<sup>a</sup>, Ge Lou<sup>c</sup> and Kang Li<sup>a</sup>.

<sup>a</sup> Department of Epidemiology and Biostatistics, School of Public Health, Harbin Medical University, Harbin 150086, P.R. China.

<sup>b</sup> Department of Cardiology, The Second Affiliated Hospital of Harbin Medical University, and The Key Laboratory of Myocardial Ischemia, Harbin Medical University, Harbin 150086, P.R. China.

<sup>c</sup> Department of Gynecology Oncology, The Tumor Hospital, Harbin Medical University, Harbin 150086, P. R. China.

#### Address correspondence to:

Kang Li, Ph.D., Department of Epidemiology and Biostatistics, School of Public Health, Harbin Medical University, Harbin 150086, P.R. China. E-mail:

likang@ems.hrbmu.edu.cn; and Ge Lou, M.D., Department of Gynecology Oncology,

The Tumor Hospital, Harbin Medical University, Harbin 150086, P.R. China. E-mail:

louge@ems.hrbmu.edu.cn

## Strategy of metabolite identification

First, peak lists and annotation results obtained by R package XCMS<sup>1</sup> and CAMERA<sup>2</sup> were analyzed to find quasi-molecular ions and determine the corresponding molecular weights.

Second, the exact molecular weights of the monoisotopic ions were used to search the online databases, such as HMDB<sup>3</sup> (<http://www.hmdb.ca/>), METLIN<sup>4</sup> (<http://metlin.scripps.edu/>) and MassBank<sup>5</sup> (<http://www.massbank.jp/>). The mass tolerance between the measured  $m/z$  values and the exact mass of the components of interest was set within 15 ppm.

Third, a QTOF mass analyzer (6530, Agilent Technologies) was used to produce fragmentation patterns and structure information for biomarker candidates in the MS/MS experiments. The MS/MS fragmentation patterns of the biomarkers were compared to the spectral data of metabolites that had the same  $m/z$  in HMDB, METLIN or MassBank.

Finally, if available, confirmation with standards was performed by comparison of retention time, isotopic distribution, and fragments of reference standards (Sigma-Aldrich) with those obtained in real samples.

Metabolite identification was classed into 4 levels based on the Metabolomics Standard Initiative<sup>6</sup>:

The first level (level 1): Metabolites are verified by reference standards. Fig. S3 and Fig. S4 are representative identification procedures using reference standards.

The second level (level 2): Metabolites are identified based on accurate mass data, retention time, experimental MS/MS spectra, and library MS/MS spectra. Fig. S5 and Fig. S6 are representative identification procedures based on MS/MS spectral matching.

The third level (level 3): Metabolites are identified based on accurate mass data, retention time, experimental MS/MS spectra, and knowledge of characteristic MS/MS ions spectra. Fig. S7 and Fig. S8 are representative identification procedures based on characteristic MS/MS ions spectra.

The fourth level (level 4): Metabolites are speculated based on accurate mass data, retention time, and biological relevance. Metabolites in this level would be further validated in the future with the improvement of library spectra and availability of reference standards.

## **Reference:**

- 1 Smith, C. A., Want, E. J., O'Maille, G., Abagyan, R. & Siuzdak, G. XCMS: processing mass spectrometry data for metabolite profiling using nonlinear peak alignment, matching, and identification. *Anal Chem* **78**, 779-787, (2006).
- 2 Kuhl, C., Tautenhahn, R., Bottcher, C., Larson, T. R. & Neumann, S. CAMERA: an integrated strategy for compound spectra extraction and annotation of liquid chromatography/mass spectrometry data sets. *Anal Chem* **84**, 283-289, (2012).
- 3 Wishart, D. S. *et al.* HMDB 3.0--The Human Metabolome Database in 2013.

- Nucleic acids research* **41**, D801-807, (2013).
- 4 Smith, C. A. *et al.* METLIN: a metabolite mass spectral database. *Ther Drug Monit* **27**, 747-751, (2005).
- 5 Horai, H. *et al.* MassBank: a public repository for sharing mass spectral data for life sciences. *J Mass Spectrom* **45**, 703-714, (2010).
- 6 Sumner, L. W. *et al.* Proposed minimum reporting standards for chemical analysis Chemical Analysis Working Group (CAWG) Metabolomics Standards Initiative (MSI). *Metabolomics* **3**, 211-221, (2007).

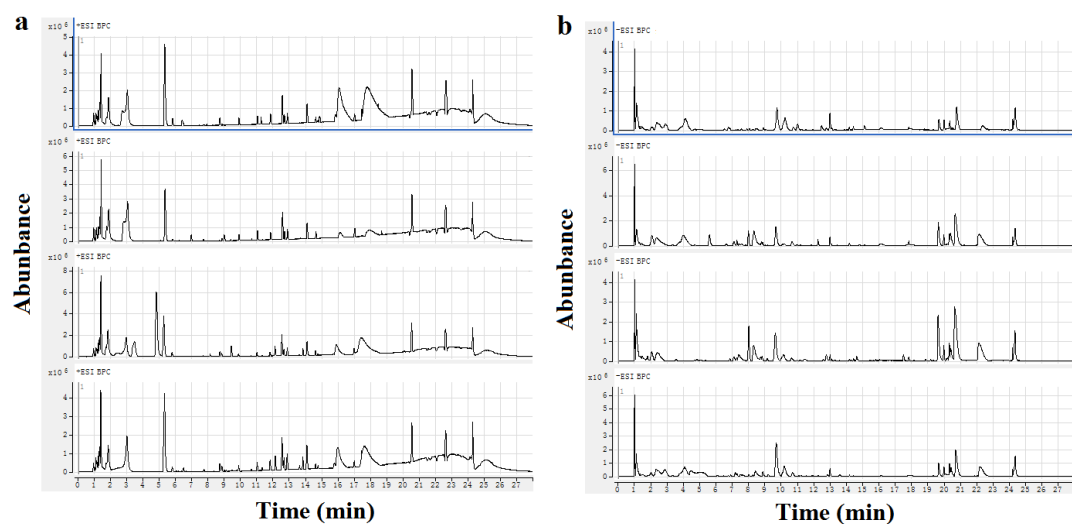

**Fig. S1** Typical RPLC-QTOF/MS chromatograms of plasma samples for a control woman, a primary EOC patient, a post-operative EOC patient and a recurrent EOC patient in ESI+ mode (a) and ESI- mode (b), respectively.

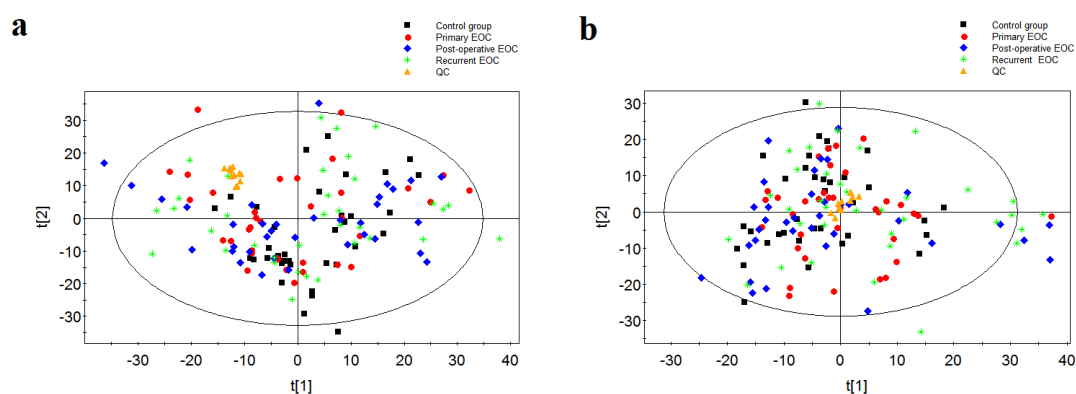

**Fig. S2** PCA score plots for discriminating control samples, primary EOC samples, post-operative EOC samples, relapsed EOC samples and QC samples in ESI+ mode (a) and ESI- mode (b), respectively.

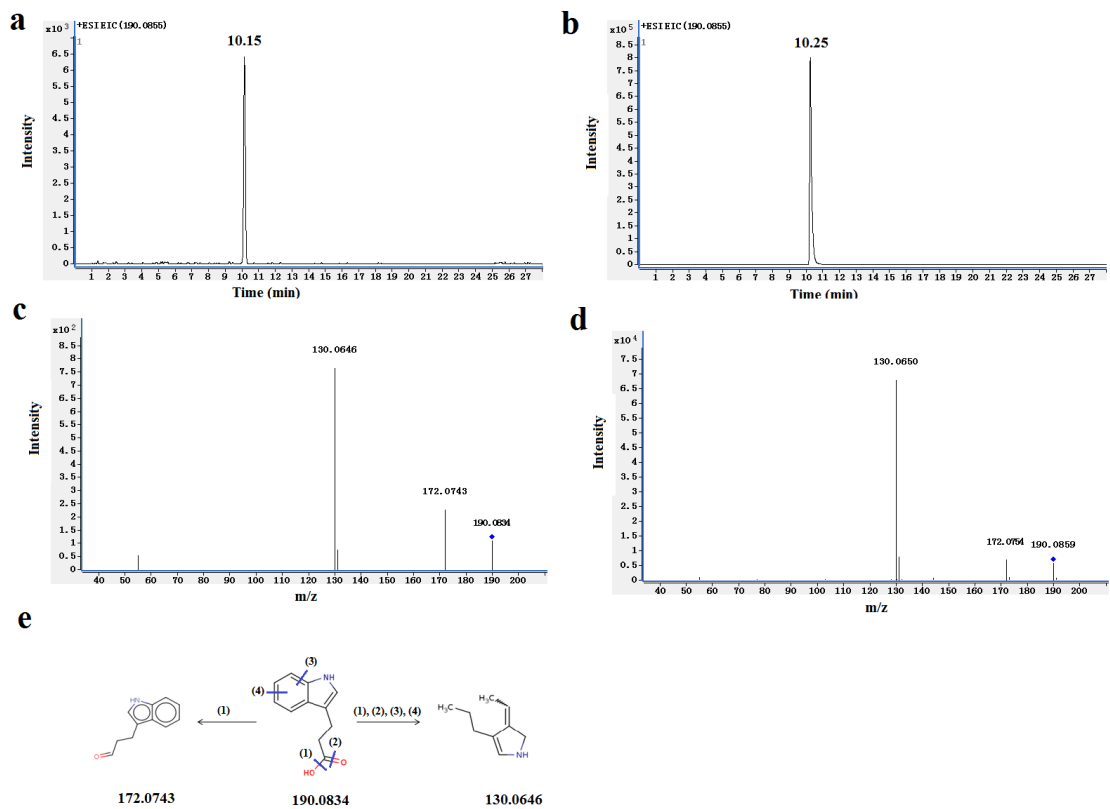

**Fig. S3** The identification information of potential biomarker 3-indolepropionic acid in ESI+ mode. (a) The extracted ion chromatographic peak of quasi-molecular ion ( $[M+H]^+$ ) at  $m/z$  190.0855 in a plasma sample. (b) The extracted ion chromatographic peak of quasi-molecular ion ( $[M+H]^+$ ) of reference standard 3-indolepropionic acid. (c) The MS/MS spectrum of quasi-molecular ion ( $[M+H]^+$ ) at  $m/z$  190.0855 at 10.15 min in a plasma sample. (d) The MS/MS spectrum of quasi-molecular ion ( $[M+H]^+$ ) of reference standard 3-indolepropionic acid. (e) The fragment ions of 3-Indolepropionic acid.

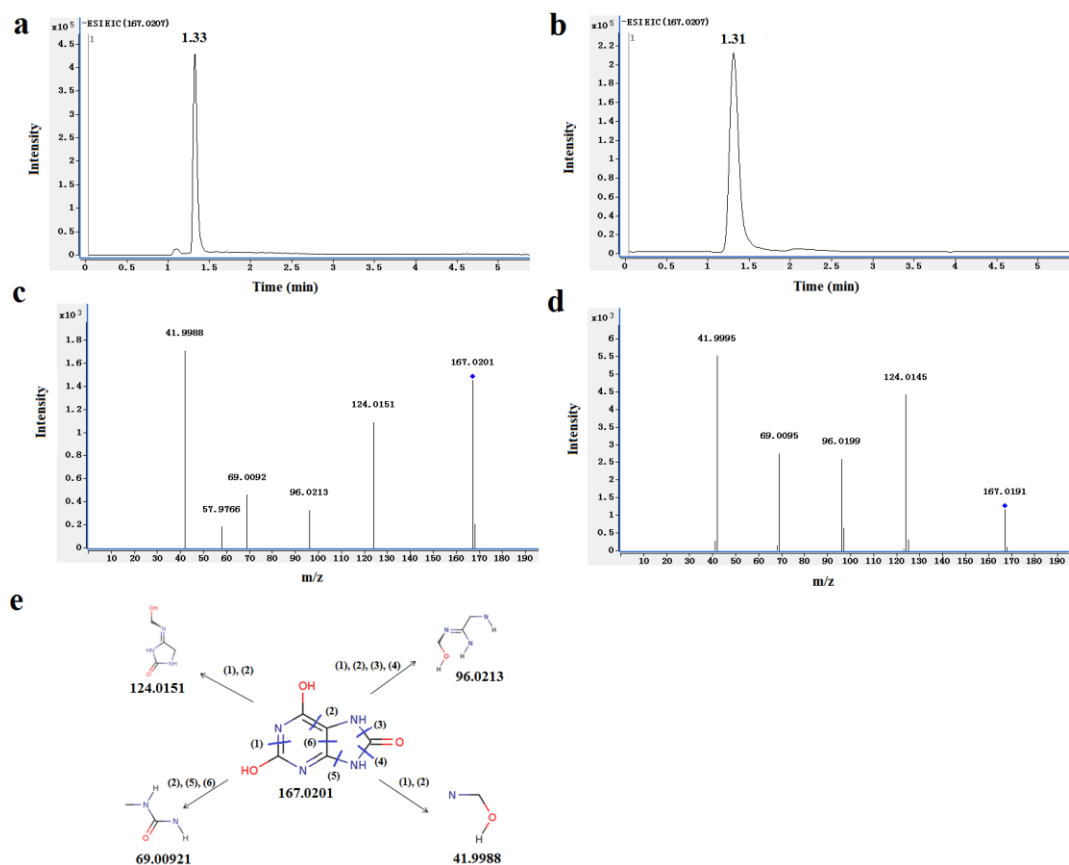

**Fig. S4** The identification information of potential biomarker uric acid in ESI- mode. (a) The extracted ion chromatographic peak of quasi-molecular ion ( $[M-H]^-$ ) at  $m/z$  167.0207 in a plasma sample. (b) The extracted ion chromatographic peak of quasi-molecular ion ( $[M-H]^-$ ) of reference standard uric acid. (c) The MS/MS spectrum of quasi-molecular ion ( $[M-H]^-$ ) at  $m/z$  167.0207 at 1.33 min in a plasma sample. (d) The MS/MS spectrum of quasi-molecular ion ( $[M-H]^-$ ) of reference standard uric acid. (e) The fragment ions of uric acid.

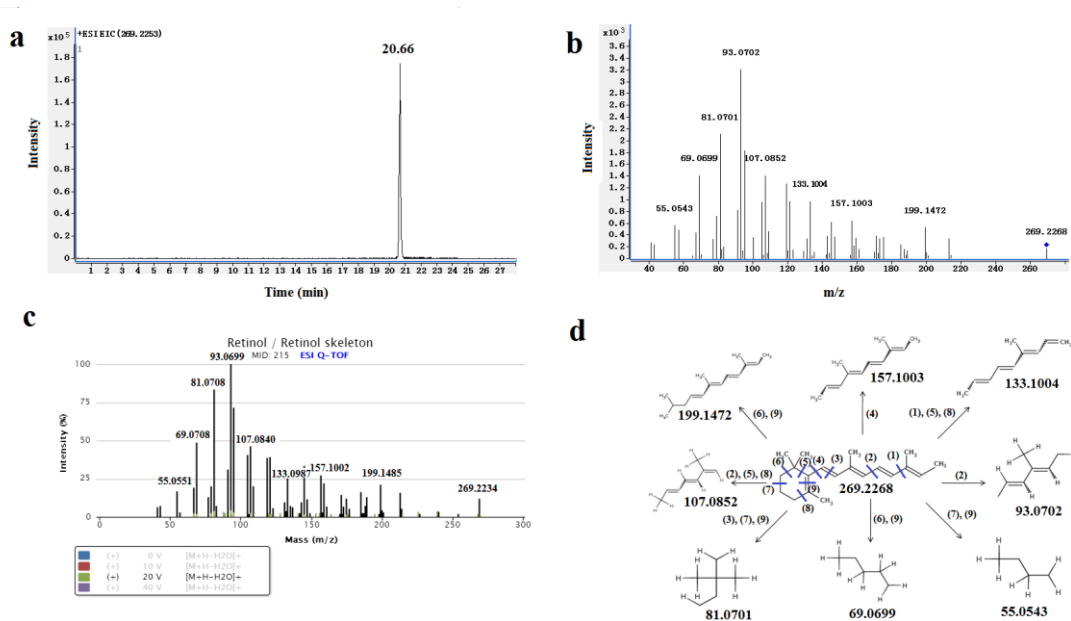

**Fig. S5** The identification information of potential biomarker retinol in ESI+ mode. (a) The extracted ion chromatographic peak of quasi-molecular ion ( $[M+H-H_2O]^+$ ) at  $m/z$  269.2253 in a plasma sample. (b) The MS/MS spectrum of quasi-molecular ion ( $[M+H-H_2O]^+$ ) at  $m/z$  269.2253 at 20.66 min in a plasma sample. (c) The MS/MS spectrum of quasi-molecular ion ( $[M+H-H_2O]^+$ ) of retinol in the METLIN database. (d) The fragment ions of retinol.

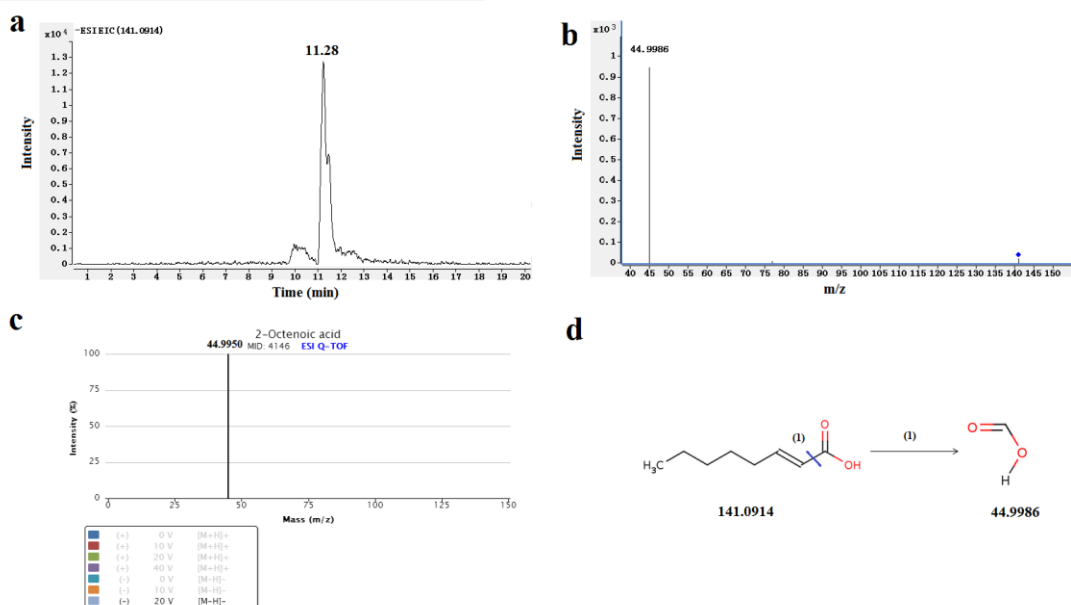

**Fig. S6** The identification information of potential biomarker 2-octenoic acid in ESI- mode. (a) The extracted ion chromatographic peak of quasi-molecular ion ( $[M-H]^-$ ) at  $m/z$  141.0914 in a plasma sample. (b) The MS/MS spectrum of quasi-molecular ion ( $[M-H]^-$ ) at  $m/z$  141.0914 at 11.28 min in a plasma sample. (c) The MS/MS spectrum of quasi-molecular ion ( $[M-H]^-$ ) of 2-Octenoic acid in the METLIN database. (d) The fragment ions of 2-Octenoic acid.



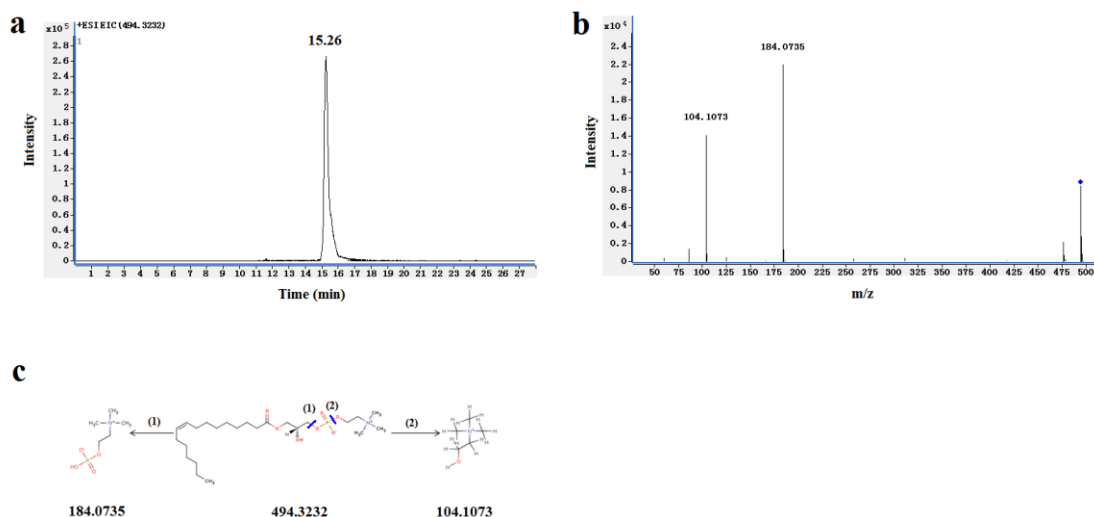

**Fig. S7** The identification information of potential biomarker LysoPC(16:1) in ESI+ mode. (a) The extracted ion chromatographic peak of quasi-molecular ion ( $[M+H]^+$ ) at m/z 494.3232 in a plasma sample. (b) The MS/MS spectrum of quasi-molecular ion ( $[M+H]^+$ ) at m/z 494.3232 at 15.26 min in a plasma sample. (c) The characteristic fragment ions (184.0735, 104.1073) of LysoPC(16:1).

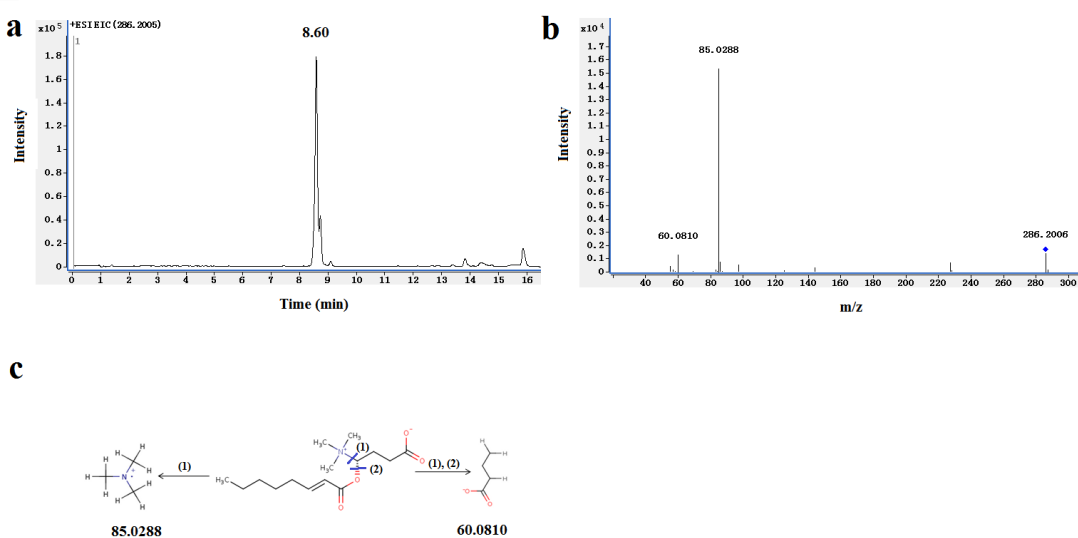

**Fig. S8** The identification information of potential biomarker 2-octenoylcarnitine in ESI- mode. (a) The extracted ion chromatographic peak of quasi-molecular ion ( $[M+H]^+$ ) at m/z 286.2005 in a plasma sample. (b) The MS/MS spectrum of quasi-molecular ion ( $[M+H]^+$ ) at m/z 286.2005 at 8.60 min in a plasma sample. (c) The characteristic fragment ions (85.0288, 60.0810) of 2-octenoylcarnitine.

**Table S1** The detailed information about 37 potential biomarkers that are differential between primary EOC patients and controls

| No.                                              | Metabolite                      | m/z      | RT(min) | ppm  | CV%   | L <sup>a</sup> | FC <sup>b</sup> | P        | VIP  | Pathway                                |
|--------------------------------------------------|---------------------------------|----------|---------|------|-------|----------------|-----------------|----------|------|----------------------------------------|
| Positive-ion electrospray ionization mode (ESI+) |                                 |          |         |      |       |                |                 |          |      |                                        |
| 1                                                | LysoPC(18:2)                    | 520.3366 | 16.04   | 6.14 | 2.69  | 3              | -0.60           | 3.20E-06 | 2.69 | Glycerophospholipid metabolism         |
| 2                                                | LysoPC(18:3)                    | 518.3227 | 14.76   | 2.70 | 4.16  | 3              | -0.83           | 0.00018  | 2.27 | Glycerophospholipid metabolism         |
| 3                                                | LysoPC(14:0)                    | 468.3073 | 14.61   | 2.56 | 4.54  | 3              | -0.85           | 0.00019  | 2.24 | Glycerophospholipid metabolism         |
| 4                                                | LysoPC(18:1)                    | 522.3535 | 18.60   | 3.64 | 2.20  | 3              | -0.44           | 0.001012 | 2.05 | Glycerophospholipid metabolism         |
| 5                                                | LysoPC(16:1)                    | 494.3232 | 15.26   | 1.82 | 4.26  | 3              | -0.6            | 0.000806 | 2.06 | Glycerophospholipid metabolism         |
| 6                                                | LysoPC(22:5)                    | 570.3534 | 16.53   | 3.51 | 3.16  | 3              | -0.57           | 0.002168 | 1.94 | Glycerophospholipid metabolism         |
| 7                                                | LysoPC(20:3)                    | 546.3544 | 17.07   | 1.83 | 3.27  | 3              | -0.58           | 0.002075 | 1.93 | Glycerophospholipid metabolism         |
| 8                                                | LysoPC(20:4)                    | 544.3369 | 15.83   | 5.33 | 3.16  | 3              | -0.43           | 0.000748 | 2.05 | Glycerophospholipid metabolism         |
| 9                                                | LysoPE(18:2/0:0)                | 478.293  | 14.86   | 0.42 | 3.76  | 3              | -0.52           | 0.002168 | 1.91 | Lysophospholipid metabolism            |
| 10                                               | LysoPE(0:0/18:1)                | 480.3082 | 16.16   | 0.62 | 1.90  | 3              | -0.37           | 0.008377 | 1.63 | Lysophospholipid metabolism            |
| 11                                               | L-Tryptophan                    | 205.0957 | 5.53    | 7.31 | 9.65  | 1              | -0.32           | 0.011869 | 1.56 | Tryptophan metabolism                  |
| 12                                               | Kynurenine                      | 209.0914 | 3.35    | 3.35 | 11.19 | 1              | 0.59            | 0.00039  | 2.61 | Tryptophan metabolism                  |
| 13                                               | 3-Indolepropionic acid          | 190.0855 | 10.28   | 4.21 | 5.73  | 1              | -1.47           | 0.005872 | 1.90 | Tryptophan metabolism                  |
| 14                                               | Tetracosahexaenoic acid         | 357.2776 | 14.80   | 3.36 | 9.68  | 3              | -1.86           | 0.003231 | 1.93 | Linoleic acid metabolism               |
| 15                                               | Aldosterone                     | 361.1998 | 10.30   | 3.32 | 4.75  | 4              | -0.58           | 9.51E-05 | 2.51 | Steroidogenesis                        |
| 16                                               | Glycoursodeoxycholic acid       | 450.3201 | 13.02   | 2.89 | 5.82  | 4              | -1.8            | 0.001835 | 2.30 | Bile acid biosynthesis                 |
| 17                                               | Hypoxanthine                    | 137.0460 | 1.43    | 1.46 | 2.41  | 1              | 0.85            | 0.004392 | 1.95 | Purine metabolism                      |
| 18                                               | MG(24:6/0:0/0:0)                | 431.3139 | 16.63   | 3.94 | 4.66  | 4              | -0.39           | 0.0014   | 1.93 | Monoacylglyceride metabolism           |
| 19                                               | 2-Octenoylcarnitine             | 286.2005 | 8.89    | 2.74 | 3.91  | 3              | -0.83           | 0.000109 | 2.46 | Others                                 |
| 20                                               | Piperine                        | 286.1431 | 13.84   | 2.45 | 2.89  | 1              | -2.37           | 0.015023 | 1.92 | Lysine metabolism                      |
| 21                                               | 2-Piperidinone                  | 100.0757 | 4.30    | 0.00 | 11.54 | 1              | -0.61           | 0.004895 | 1.79 | Lysine metabolism                      |
| 22                                               | Retinol <sup>c</sup>            | 269.2253 | 20.44   | 5.94 | 6.53  | 2              | -0.47           | 0.001617 | 1.95 | Retinol metabolism                     |
| 23                                               | Dodecanedioic acid <sup>d</sup> | 272.1850 | 7.83    | 2.20 | 6.19  | 4              | -0.66           | 0.00119  | 2.03 | Metabolism of lipids and carbohydrates |
| 24                                               | L-Thyroxine                     | 777.6911 | 11.11   | 3.73 | 6.27  | 1              | 0.25            | 0.006899 | 2.09 | Tyrosine metabolism                    |
| Negative-ion electrospray ionization mode (ESI-) |                                 |          |         |      |       |                |                 |          |      |                                        |
| 25                                               | 12,13-DiHODE                    | 311.2202 | 13.38   | 8.35 | 4.07  | 3              | -0.74           | 0.000215 | 2.75 | Fatty acid metabolism                  |

|    |                                 |          |         |      |       |   |       |          |      |                         |
|----|---------------------------------|----------|---------|------|-------|---|-------|----------|------|-------------------------|
| 26 | 2-Octenoic acid                 | 141.0910 | 11.15   | 7.80 | 10.89 | 2 | -0.65 | 0.008983 | 2.01 | Fatty acid biosynthesis |
| 27 | 19,20-DiHDPA                    | 361.2359 | 14.61   | 6.92 | 6.87  | 3 | -0.36 | 0.001648 | 2.71 | Fatty acid metabolism   |
| 28 | N-Undecanoylglycine             | 242.1750 | 11.05   | 4.96 | 3.17  | 4 | 0.32  | 0.021176 | 1.87 | Fatty acid metabolism   |
| 29 | $\gamma$ -CEHC                  | 263.1273 | 10.80   | 6.08 | 4.72  | 2 | -0.95 | 0.008108 | 1.79 | Vitamin E metabolism    |
| 30 | p-Salicylic acid                | 137.0242 | 2.74    | 1.46 | 14.97 | 2 | -1.1  | 0.002942 | 2.30 | Ubiquinone biosynthesis |
| 31 | Nutriacholic acid               | 389.2665 | 12.91   | 8.22 | 8.76  | 4 | -0.60 | 0.000338 | 2.48 | Bile acid metabolism    |
| 32 | Deoxycholic acid                | 391.2819 | 15.0133 | 8.94 | 5.15  | 1 | -1.11 | 0.013663 | 1.80 | Bile acid biosynthesis  |
| 33 | Hydroxyphenyllactic acid        | 181.0497 | 1.46    | 4.97 | 2.32  | 2 | 0.22  | 0.013832 | 2.06 | Tyrosine metabolism     |
| 34 | 4-Nitrophenol                   | 138.0190 | 9.54    | 5.07 | 2.72  | 2 | 0.24  | 0.002721 | 2.29 | Microbial metabolism    |
| 35 | L-Histidine                     | 154.0614 | 1.17    | 5.19 | 15.47 | 1 | -0.47 | 0.000123 | 2.93 | Histidine metabolism    |
| 36 | 2,6-Dihydroxybenzoic acid       | 153.0180 | 3.19    | 8.50 | 3.08  | 4 | -0.61 | 0.013891 | 1.71 | Others                  |
| 37 | $\beta$ -Hydroxyisovaleric acid | 117.0550 | 1.71    | 5.98 | 1.20  | 3 | 0.51  | 0.000563 | 2.34 | Others                  |

Abbreviations: Coefficient of variation (CV); Epithelial ovarian cancer (EOC); Fold change (FC); Measured mass to charge ratio (m/z); Retention time (min, RT); Variable importance in the projection (VIP).

<sup>a</sup>Metabolite identification was classed into 4 levels based on the Metabolomics Standard Initiative: 1. Metabolites are verified by reference standards. 2. Metabolites are identified based on accurate mass data, retention time, experimental MS/MS spectra, and library MS/MS spectra. 3. Metabolites are identified based on accurate mass data, retention time, experimental MS/MS spectra, and knowledge of characteristic MS/MS ions spectra. 4. Metabolites are speculated based on accurate mass data, retention time, and biological relevance.

<sup>b</sup>Fold change was calculated from the arithmetic mean values of each group. Fold change with a positive value indicates that the concentration of certain metabolite is up-regulated in primary EOC patients compared to controls.

<sup>c</sup>This ion was the fragment ion of the metabolite ( $[M-H_2O+H]^+$ ).

<sup>d</sup>This ion was the adduct ion of the metabolite ( $[M+ACN+H]^+$ ).

**Table S2** The detailed information about 30 potential biomarkers that are differential between pre- and post-operative EOC patients

| No.                                              | Metabolite                   | m/z      | RT(min) | ppm  | CV%   | L <sup>a</sup> | FC <sup>b</sup> | P        | VIP  | Pathway                         |
|--------------------------------------------------|------------------------------|----------|---------|------|-------|----------------|-----------------|----------|------|---------------------------------|
| Positive-ion electrospray ionization mode (ESI+) |                              |          |         |      |       |                |                 |          |      |                                 |
| 1                                                | LysoPC(22:5)                 | 570.3534 | 16.53   | 3.51 | 3.16  | 3              | -0.52           | 0.007033 | 2.11 | Glycerophospholipid metabolism  |
| 2                                                | LysoPC(20:3)                 | 546.3544 | 17.07   | 1.83 | 3.27  | 3              | -0.52           | 0.020812 | 1.82 | Glycerophospholipid metabolism  |
| 3                                                | LysoPC(20:4)                 | 544.3369 | 15.83   | 5.33 | 3.16  | 3              | -0.43           | 0.007716 | 2.09 | Glycerophospholipid metabolism  |
| 4                                                | Kynurenine                   | 209.0914 | 3.35    | 3.35 | 11.19 | 1              | -0.38           | 0.003527 | 2.31 | Tryptophan metabolism           |
| 5                                                | 3-Indolepropionic acid       | 190.0855 | 10.28   | 4.21 | 5.73  | 1              | -3.27           | 0.00016  | 2.92 | Tryptophan metabolism           |
| 6                                                | Piperine                     | 286.1431 | 13.84   | 2.45 | 2.89  | 1              | -3.2            | 0.000275 | 2.91 | Lysine metabolism               |
| 7                                                | L-Valine                     | 118.0857 | 1.32    | 5.08 | 17.34 | 1              | 0.42            | 0.004208 | 2.25 | Valine metabolism               |
| 8                                                | 3,4-Dihydroxymandel aldehyde | 169.0490 | 9.93    | 2.96 | 6.89  | 4              | -1.72           | 0.025248 | 1.80 | Tyrosine metabolism             |
| 9                                                | Creatine                     | 132.0768 | 1.17    | 0.00 | 8.02  | 2              | 0.71            | 0.000211 | 2.88 | Arginine and Proline Metabolism |
| 10                                               | Creatinine                   | 114.0661 | 1.17    | 0.88 | 2.31  | 2              | -0.29           | 0.001363 | 2.49 | Arginine and Proline Metabolism |
| 11                                               | Uric acid                    | 169.0355 | 1.38    | 0.59 | 14.93 | 1              | -0.47           | 0.004101 | 2.24 | Purine metabolism               |
| 12                                               | Glycocholic Acid             | 466.3149 | 11.14   | 3.00 | 9.26  | 2              | 1.15            | 0.015622 | 1.91 | Bile Acid Biosynthesis          |
| 13                                               | 24,25-Hydroxyvitamin D3      | 417.3343 | 11.16   | 4.79 | 15.76 | 4              | 0.84            | 0.001372 | 2.48 | Steroid biosynthesis            |
| 14                                               | $\alpha$ -Linolenic Acid     | 279.2312 | 19.37   | 2.51 | 1.55  | 2              | 0.43            | 0.023751 | 1.78 | Linoleic acid metabolism        |
| Negative-ion electrospray ionization mode (ESI-) |                              |          |         |      |       |                |                 |          |      |                                 |
| 15                                               | Capric acid                  | 171.1378 | 15.67   | 7.60 | 7.51  | 4              | 2.04            | 0.007265 | 1.58 | Fatty acid biosynthesis         |
| 16                                               | Caprylic acid                | 143.1069 | 13.00   | 6.29 | 10.07 | 4              | 1.9             | 0.030718 | 1.29 | Fatty acid biosynthesis         |
| 17                                               | 19,20-DiHDPA                 | 361.2359 | 14.61   | 6.92 | 6.87  | 3              | 0.45            | 0.002449 | 1.78 | Fatty acid metabolism           |
| 18                                               | 12,13-DiHOME                 | 313.2356 | 20.03   | 8.94 | 6.24  | 3              | 1.27            | 0.000198 | 2.25 | Linoleic acid metabolism        |
| 19                                               | Glyceric acid                | 105.0198 | 1.27    | 4.76 | 9.10  | 2              | 0.29            | 0.023953 | 1.45 | Glycerolipid Metabolism         |
| 20                                               | $\gamma$ -CEHC               | 263.1273 | 10.80   | 6.08 | 4.72  | 2              | 0.78            | 0.006541 | 1.94 | Vitamin E metabolism            |
| 21                                               | Alpha-CEHC                   | 277.1419 | 15.44   | 9.38 | 8.26  | 2              | 1.98            | 0.002141 | 1.79 | Vitamin E metabolism            |
| 22                                               | p-Cresol sulfate             | 187.0053 | 3.33    | 9.63 | 11.94 | 2              | -4.3            | 7.24E-07 | 2.87 | Microbial metabolism            |
| 23                                               | Indoxylsulfuric acid         | 212.0007 | 2.21    | 7.55 | 3.77  | 2              | -1.45           | 0.013339 | 1.56 | Tryptophan metabolism           |
| 24                                               | Hydroxyphenyllactic acid     | 181.0497 | 1.46    | 4.97 | 2.32  | 2              | -0.37           | 0.001093 | 1.84 | Tyrosine metabolism             |
| 25                                               | Pyroglutamic acid            | 128.0352 | 1.17    | 0.78 | 1.66  | 2              | 0.30            | 0.044838 | 1.18 | Glutathione Metabolism          |
| 26                                               | L-beta-aspartyl-L-           | 261.0736 | 10.62   | 3.06 | 5.51  | 4              | -0.67           | 0.004522 | 1.72 | Protein breakdown               |

| glutamic acid |                           |          |       |      |      |   |       |          |      |                                    |
|---------------|---------------------------|----------|-------|------|------|---|-------|----------|------|------------------------------------|
| 27            | L-Lactic acid             | 89.0249  | 1.44  | 5.62 | 2.85 | 1 | -0.24 | 0.011231 | 1.51 | Glycolysis<br>Pyruvate Metabolism  |
| 28            | Perillic acid             | 165.0913 | 12.49 | 4.85 | 4.47 | 4 | 0.46  | 0.018894 | 1.51 | Limonene and pinene<br>degradation |
| 29            | 3-Dehydroquinic acid      | 189.0402 | 1.16  | 1.59 | 8.03 | 4 | 0.49  | 0.001602 | 1.83 | Others                             |
| 30            | 2,6-Dihydroxybenzoic acid | 153.0180 | 3.187 | 8.50 | 3.08 | 4 | -0.69 | 0.037298 | 1.38 | Others                             |

<sup>a</sup>Metabolite identification was classed into 4 levels based on the Metabolomics Standard Initiative (Same as Table S1).

<sup>b</sup>Fold change was calculated from the arithmetic mean values of each group. Fold change with a positive value indicates that the concentration of certain metabolite is up-regulated in post-operative EOC patients compared to primary EOC patients.

**Table S3** The detailed information about 42 potential biomarkers that are differential between post-operative EOC patients and relapsed EOC patients

| No.                                              | Metabolite                     | m/z      | RT(min) | ppm   | CV%   | L <sup>a</sup> | FC <sup>b</sup> | P        | VIP  | Pathway                         |
|--------------------------------------------------|--------------------------------|----------|---------|-------|-------|----------------|-----------------|----------|------|---------------------------------|
| Positive-ion electrospray ionization mode (ESI+) |                                |          |         |       |       |                |                 |          |      |                                 |
| 1                                                | LysoPC(14:0)                   | 468.3073 | 14.61   | 2.56  | 4.54  | 3              | 1.25            | 9.09E-07 | 2.45 | Glycerophospholipid metabolism  |
| 2                                                | LysoPC(20:3)                   | 546.3544 | 17.07   | 1.83  | 3.27  | 3              | 0.92            | 0.000175 | 1.99 | Glycerophospholipid metabolism  |
| 3                                                | LysoPC(16:1)                   | 494.3232 | 15.26   | 1.82  | 4.26  | 3              | 0.79            | 0.00027  | 1.96 | Glycerophospholipid metabolism  |
| 4                                                | LysoPC(15:0)                   | 482.3277 | 15.91   | 7.46  | 4.73  | 3              | 0.65            | 0.000312 | 1.88 | Glycerophospholipid metabolism  |
| 5                                                | LysoPC(22:5)                   | 570.3534 | 16.53   | 3.51  | 3.16  | 3              | 0.71            | 0.000659 | 1.89 | Glycerophospholipid metabolism  |
| 6                                                | LysoPC(16:0)                   | 496.3368 | 17.65   | 6.04  | 2.52  | 1              | 0.37            | 0.004413 | 1.70 | Glycerophospholipid metabolism  |
| 7                                                | LysoPC(18:2)                   | 520.3366 | 16.04   | 6.15  | 2.69  | 3              | 0.49            | 0.004159 | 1.72 | Glycerophospholipid metabolism  |
| 8                                                | LysoPC(18:3)                   | 518.3227 | 14.76   | 2.70  | 4.16  | 3              | 0.80            | 0.011526 | 1.53 | Glycerophospholipid metabolism  |
| 9                                                | LysoPC(20:4)                   | 544.3369 | 15.83   | 5.33  | 3.16  | 3              | 0.41            | 0.012363 | 1.61 | Glycerophospholipid metabolism  |
| 10                                               | LysoPE(16:1/0:0)               | 452.2763 | 14.21   | 1.99  | 4.02  | 3              | 0.99            | 0.00039  | 1.90 | Lysophospholipid metabolism     |
| 11                                               | LysoPE(18:2/0:0)               | 478.293  | 14.86   | 0.42  | 3.76  | 3              | 0.61            | 0.00141  | 1.82 | Lysophospholipid metabolism     |
| 12                                               | LysoPE(0:0/22:5)               | 528.3069 | 15.28   | 3.03  | 4.36  | 3              | 0.40            | 0.009183 | 1.64 | Lysophospholipid metabolism     |
| 13                                               | LysoPE(0:0/22:4)               | 530.3232 | 16.34   | 1.70  | 3.60  | 3              | 0.51            | 0.01158  | 1.44 | Lysophospholipid metabolism     |
| 14                                               | LysoPE(0:0/20:5)               | 500.2764 | 13.95   | -1.60 | 4.41  | 3              | 0.57            | 0.014937 | 1.59 | Lysophospholipid metabolism     |
| 15                                               | Creatinine                     | 114.0661 | 1.17    | 0.88  | 2.31  | 2              | 0.35            | 9.18E-05 | 2.28 | Arginine and Proline Metabolism |
| 16                                               | Creatine                       | 132.0768 | 1.17    | 0.00  | 8.02  | 2              | -0.80           | 0.000306 | 1.90 | Arginine and Proline Metabolism |
| 17                                               | L-Tryptophan                   | 205.0957 | 5.53    | 7.31  | 9.65  | 1              | 0.30            | 0.009646 | 1.52 | Tryptophan metabolism           |
| 18                                               | 3-Indolepropionic acid         | 190.0855 | 10.28   | 4.21  | 5.73  | 1              | 4.64            | 1.91E-05 | 2.62 | Tryptophan metabolism           |
| 19                                               | L-Hexanoylcarnitine            | 260.1847 | 7.69    | 3.46  | 13.58 | 3              | -0.69           | 0.004253 | 1.57 | Fatty acid oxidation            |
| 20                                               | 4,8 dimethylnonanoyl carnitine | 330.2623 | 5.50    | 4.84  | 4.04  | 3              | 0.78            | 0.000972 | 2.03 | Fatty acid oxidation            |
| 21                                               | 2,6 dimethylheptanoyl          | 302.2309 | 10.47   | 5.62  | 10.52 | 3              | 0.70            | 0.002046 | 1.81 | Fatty acid oxidation            |

|                                                  |                                 |          |       |      |       |   |       |          |      |                              |  |
|--------------------------------------------------|---------------------------------|----------|-------|------|-------|---|-------|----------|------|------------------------------|--|
|                                                  | carnitine                       |          |       |      |       |   |       |          |      |                              |  |
| 22                                               | Hypoxanthine                    | 137.0460 | 1.43  | 1.46 | 2.41  | 1 | -0.84 | 0.001802 | 1.79 | Purine metabolism            |  |
| 23                                               | Piperine                        | 286.1431 | 13.84 | 2.45 | 2.89  | 1 | 3.40  | 0.000794 | 1.98 | Lysine metabolism            |  |
| 24                                               | MG(24:6/0/0/0:0)                | 431.3139 | 16.63 | 3.94 | 4.66  | 4 | 0.28  | 0.008309 | 1.42 | Monoacylglyceride metabolism |  |
| 25                                               | 2-octenoylcarnitine             | 286.2005 | 8.89  | 2.80 | 3.91  | 3 | -0.75 | 0.001258 | 1.85 | Others                       |  |
| Negative-ion electrospray ionization mode (ESI-) |                                 |          |       |      |       |   |       |          |      |                              |  |
| 26                                               | LysoPE(0:0/18:2)                | 476.2748 | 14.84 | 7.35 | 3.54  | 3 | 0.61  | 0.002224 | 1.58 | Lysophospholipid metabolism  |  |
| 27                                               | LysoPE(20:5/0:0)                | 498.2587 | 13.95 | 7.83 | 6.70  | 3 | 0.67  | 0.016957 | 1.29 | Lysophospholipid metabolism  |  |
| 28                                               | p-Cresol sulfate                | 187.0053 | 3.33  | 9.63 | 11.94 | 2 | 5.25  | 0.000244 | 1.99 | Microbial metabolism         |  |
| 29                                               | Indoxylsulfuric acid            | 212.0007 | 2.21  | 7.55 | 3.77  | 2 | 1.62  | 0.016512 | 1.23 | Tryptophan metabolism        |  |
| 30                                               | Hydroxyphenyllactic acid        | 181.0497 | 1.46  | 4.97 | 2.32  | 2 | 0.35  | 0.002346 | 1.54 | Tyrosine metabolism          |  |
| 31                                               | Pyroglutamic acid               | 128.0352 | 1.17  | 0.78 | 1.66  | 2 | -0.42 | 0.018433 | 1.22 | Glutathione Metabolism       |  |
| 32                                               | Uric acid                       | 167.0207 | 1.33  | 2.39 | 3.11  | 1 | 0.38  | 6.59E-05 | 2.02 | Purine metabolism            |  |
| 33                                               | 12,13-DiHODE                    | 311.2202 | 13.38 | 8.35 | 4.07  | 3 | 1.02  | 3.20E-07 | 2.63 | Fatty acid metabolism        |  |
| 34                                               | L-Glutamine                     | 145.0619 | 1.15  | 0.00 | 4.53  | 2 | 0.42  | 0.001521 | 1.63 | Purine metabolism            |  |
| 35                                               | L-Histidine                     | 154.0614 | 1.17  | 5.19 | 15.47 | 1 | 0.37  | 0.002173 | 1.57 | Histidine metabolism         |  |
| 36                                               | p-Salicylic acid                | 137.0242 | 2.74  | 1.46 | 14.97 | 2 | 1.32  | 0.005454 | 1.48 | Ubiquinone biosynthesis      |  |
| 37                                               | Capric acid                     | 171.1378 | 15.67 | 7.60 | 7.51  | 4 | -2.00 | 0.007919 | 1.39 | Fatty acid biosynthesis      |  |
| 38                                               | Caprylic acid                   | 143.1069 | 13.00 | 6.29 | 10.07 | 4 | -1.78 | 0.03131  | 1.13 | Fatty acid biosynthesis      |  |
| 39                                               | 2-Octenoic acid                 | 141.0910 | 11.15 | 7.80 | 10.89 | 2 | -0.58 | 0.014356 | 1.36 | Fatty acid biosynthesis      |  |
| 40                                               | 19,20-DiHDPA                    | 361.2359 | 14.61 | 6.92 | 6.87  | 3 | -0.40 | 0.005663 | 1.58 | Fatty acid metabolism        |  |
| 41                                               | 2,6-Dihydroxybenzoic acid       | 153.0180 | 3.19  | 8.50 | 3.08  | 4 | 1.20  | 8.07E-05 | 1.95 | Others                       |  |
| 42                                               | $\beta$ -Hydroxyisovaleric acid | 117.0550 | 1.71  | 5.98 | 1.20  | 3 | -0.38 | 0.01477  | 1.26 | Others                       |  |

<sup>a</sup>Metabolite identification was classed into 4 levels based on the Metabolomics Standard Initiative (Same as Table S1).

<sup>b</sup>Fold change was calculated from the arithmetic mean values of each group. Fold change with a positive value indicates that the concentration of certain metabolite is up-regulated in recurrent EOC patients compared to post-operative EOC patients.

**Table S4** The detailed information about 26 potential biomarkers that are differential between primary EOC patients and relapsed EOC patients

| No.                                              | Metabolite                    | m/z      | RT(min) | ppm  | CV%   | L <sup>a</sup> | FC <sup>b</sup> | P        | VIP  | Pathway                                     |
|--------------------------------------------------|-------------------------------|----------|---------|------|-------|----------------|-----------------|----------|------|---------------------------------------------|
| Positive-ion electrospray ionization mode (ESI+) |                               |          |         |      |       |                |                 |          |      |                                             |
| 1                                                | LysoPC(14:0)                  | 468.3073 | 14.61   | 2.56 | 4.54  | 3              | 1.04            | 1.57E-06 | 3.53 | Glycerophospholipid metabolism              |
| 2                                                | LysoPC(18:3)                  | 518.3227 | 14.76   | 2.70 | 4.16  | 3              | 0.89            | 0.00094  | 2.56 | Glycerophospholipid metabolism              |
| 3                                                | LysoPC(18:2)                  | 520.3366 | 16.04   | 6.15 | 2.69  | 3              | 0.28            | 0.033342 | 1.65 | Glycerophospholipid metabolism              |
| 4                                                | LysoPC(16:1)                  | 494.3232 | 15.26   | 1.82 | 4.26  | 3              | 0.6             | 0.000278 | 2.73 | Glycerophospholipid metabolism              |
| 5                                                | LysoPC(20:3)                  | 546.3544 | 17.07   | 1.83 | 3.27  | 3              | 0.4             | 0.028916 | 1.69 | Glycerophospholipid metabolism              |
| 6                                                | LysoPE(18:2/0:0)              | 478.293  | 14.86   | 0.42 | 3.76  | 3              | 0.41            | 0.010696 | 1.96 | Lysophospholipid metabolism                 |
| 7                                                | LysoPE(0:0/18:1)              | 480.3082 | 16.16   | 0.62 | 1.90  | 3              | 0.31            | 0.029878 | 1.68 | Lysophospholipid metabolism                 |
| 8                                                | Methyl jasmonate              | 225.1490 | 15.57   | 2.22 | 3.79  | 4              | 0.72            | 0.0071   | 2.11 | $\alpha$ -Linolenic acid metabolism         |
| 9                                                | Tetracosahexaenoic acid       | 357.2776 | 14.80   | 3.36 | 9.68  | 3              | 1.28            | 0.039796 | 1.60 | Linoleic acid metabolism                    |
| 10                                               | MG(24:6/0:0/0:0)              | 431.3139 | 16.63   | 3.94 | 4.66  | 4              | 0.43            | 0.000181 | 2.80 | Monoacylglycerol metabolism                 |
| 11                                               | L-Tryptophan                  | 205.0957 | 5.53    | 7.31 | 9.65  | 1              | 0.32            | 0.000786 | 2.54 | Tryptophan metabolism                       |
| 12                                               | L-Kynurenine                  | 209.0914 | 3.35    | 3.35 | 11.19 | 1              | -0.38           | 0.015785 | 1.86 | Tryptophan metabolism                       |
| 13                                               | 3-Indolepropionic acid        | 190.0855 | 10.28   | 4.21 | 5.73  | 1              | 1.38            | 0.007036 | 2.09 | Tryptophan metabolism                       |
| 14                                               | Hypoxanthine                  | 137.046  | 1.43    | 1.46 | 2.41  | 1              | -0.85           | 0.002082 | 2.34 | Purine metabolism                           |
| 15                                               | Retinol                       | 269.2253 | 20.44   | 5.94 | 6.53  | 2              | 0.38            | 0.006959 | 2.08 | Retinol metabolism                          |
| Negative-ion electrospray ionization mode (ESI-) |                               |          |         |      |       |                |                 |          |      |                                             |
| 16                                               | 2,3-Dihydroxyvaleric acid     | 133.0501 | 1.44    | 3.76 | 5.02  | 4              | 0.55            | 0.000201 | 2.23 | Valine, leucine and isoleucine biosynthesis |
| 17                                               | $\alpha$ -Ketoisovaleric acid | 115.0401 | 1.47    | 0.00 | 2.15  | 2              | 0.17            | 0.029196 | 1.34 | Valine, Leucine and Isoleucine Degradation  |
| 18                                               | Glyceric acid                 | 105.0198 | 1.27    | 4.76 | 9.10  | 2              | 0.48            | 0.000241 | 2.18 | Glycine and Serine Metabolism               |
| 19                                               | L-Histidine                   | 154.0614 | 1.17    | 5.19 | 15.47 | 1              | 0.57            | 0.000146 | 2.62 | Histidine metabolism                        |
| 20                                               | L-Arabinonic acid             | 165.0395 | 1.31    | 6.06 | 2.82  | 4              | 0.34            | 0.018832 | 1.64 | Ascorbate and aldarate metabolism           |
| 21                                               | Purine                        | 119.0351 | 1.19    | 0.84 | 2.08  | 1              | 0.33            | 0.035437 | 1.33 | Purine metabolism                           |
| 22                                               | p-Salicylic acid              | 137.0242 | 2.74    | 1.46 | 14.97 | 2              | 0.91            | 0.020158 | 1.50 | Ubiquinone biosynthesis                     |



|    |                       |          |       |      |      |   |       |          |      |                       |
|----|-----------------------|----------|-------|------|------|---|-------|----------|------|-----------------------|
| 23 | Nutriacholic acid     | 389.2665 | 12.91 | 8.22 | 8.76 | 4 | 0.63  | 0.003105 | 1.87 | Bile acid metabolism  |
| 24 | 12,13-DiHODE          | 311.2200 | 13.38 | 9.00 | 4.07 | 3 | 0.83  | 4.01E-05 | 2.61 | Fatty acid metabolism |
| 25 | $\gamma$ -CEHC        | 263.1273 | 10.80 | 6.08 | 4.72 | 2 | 0.77  | 0.009211 | 1.59 | Vitamin E metabolism  |
| 26 | 4-O-Methylgallic acid | 183.0287 | 4.36  | 6.56 | 7.35 | 4 | -1.01 | 0.04182  | 1.45 | Others                |

<sup>a</sup>Metabolite identification was classed into 4 levels based on the Metabolomics Standard Initiative (Same as Table S1).

<sup>b</sup>Fold change was calculated from the arithmetic mean values of each group. Fold change with a positive value indicates that the concentration of certain metabolite is up-regulated in recurrent EOC patients compared to primary EOC patients.

**Table S5** Changes of 37 primary EOC biomarkers in response to surgery and relapse.

| Metabolite                      | Primary EOC<br><i>versus</i><br>control |                 | Post-operative<br>EOC<br><i>versus</i><br>primary EOC |                 | Relapsed EOC<br><i>versus</i><br>post-operative<br>EOC |                 | Relapsed EOC<br><i>versus</i><br>primary EOC |                 |
|---------------------------------|-----------------------------------------|-----------------|-------------------------------------------------------|-----------------|--------------------------------------------------------|-----------------|----------------------------------------------|-----------------|
|                                 | FC <sup>1</sup>                         | P value         | FC <sup>2</sup>                                       | P value         | FC <sup>3</sup>                                        | P value         | FC <sup>4</sup>                              | P value         |
| 2-Octenoylcarnitine             | <b>-0.83</b>                            | <b>0.000109</b> | <b>0.85</b>                                           | <b>0.000211</b> | <b>-0.75</b>                                           | <b>0.001258</b> | 0.09                                         | 0.434425        |
| 2-Octenoic acid                 | <b>-0.77</b>                            | <b>0.001108</b> | <b>0.85</b>                                           | <b>0.00028</b>  | <b>-0.81</b>                                           | <b>0.000983</b> | 0.03                                         | 0.636167        |
| Hydroxyphenyllactic acid        | <b>0.22</b>                             | <b>0.013832</b> | <b>-0.37</b>                                          | <b>0.001093</b> | <b>0.35</b>                                            | <b>0.002346</b> | -0.02                                        | 0.841128        |
| 19,20-DiHDPA                    | <b>-0.36</b>                            | <b>0.001648</b> | <b>0.45</b>                                           | <b>0.002449</b> | <b>-0.40</b>                                           | <b>0.005663</b> | 0.04                                         | 0.608742        |
| Retinol                         | <b>-0.47</b>                            | <b>0.001617</b> | <b>0.37</b>                                           | <b>0.006782</b> | 0.00                                                   | 0.77306         | <b>0.38</b>                                  | <b>0.006959</b> |
| Kynurenine                      | <b>0.59</b>                             | <b>0.00039</b>  | <b>-0.38</b>                                          | <b>0.003527</b> | 0.00                                                   | 0.639322        | <b>-0.38</b>                                 | <b>0.015785</b> |
| Dodecanedioic acid              | <b>-0.66</b>                            | <b>0.00119</b>  | <b>0.58</b>                                           | <b>0.001172</b> | 0.09                                                   | 0.226523        | <b>0.67</b>                                  | <b>0.003711</b> |
| $\gamma$ -CEHC                  | <b>-0.95</b>                            | <b>0.008108</b> | <b>0.78</b>                                           | <b>0.006541</b> | -0.01                                                  | 0.353464        | <b>0.77</b>                                  | <b>0.009211</b> |
| LysoPC(22:5)                    | <b>-0.57</b>                            | <b>0.002168</b> | <b>-0.52</b>                                          | <b>0.007033</b> | <b>0.71</b>                                            | <b>0.000659</b> | 0.20                                         | 0.167051        |
| LysoPC(20:4)                    | <b>-0.43</b>                            | <b>0.000748</b> | <b>-0.43</b>                                          | <b>0.007716</b> | <b>0.41</b>                                            | <b>0.012363</b> | -0.02                                        | 0.985453        |
| Piperine                        | <b>-2.37</b>                            | <b>0.015023</b> | <b>-3.20</b>                                          | <b>0.000275</b> | <b>3.40</b>                                            | <b>0.000794</b> | 0.20                                         | 0.709247        |
| LysoPC(20:3)                    | <b>-0.58</b>                            | <b>0.002075</b> | <b>-0.52</b>                                          | <b>0.020812</b> | <b>0.92</b>                                            | <b>0.000175</b> | <b>0.40</b>                                  | <b>0.028916</b> |
| 3-Indolepropionic acid          | <b>-1.47</b>                            | <b>0.005872</b> | <b>-3.27</b>                                          | <b>0.00016</b>  | <b>4.64</b>                                            | <b>1.91E-05</b> | <b>1.38</b>                                  | <b>0.007036</b> |
| 2,6-Dihydroxybenzoic acid       | <b>-0.61</b>                            | <b>0.013891</b> | <b>-0.69</b>                                          | <b>0.037298</b> | <b>1.20</b>                                            | <b>8.07E-05</b> | <b>0.51</b>                                  | <b>0.014355</b> |
| LysoPC(18:2)                    | <b>-0.60</b>                            | <b>3.20E-06</b> | -0.21                                                 | 0.301223        | <b>0.49</b>                                            | <b>0.004159</b> | <b>0.28</b>                                  | <b>0.033342</b> |
| LysoPC(18:3)                    | <b>-0.83</b>                            | <b>0.00018</b>  | 0.09                                                  | 0.347757        | <b>0.8</b>                                             | <b>0.011526</b> | <b>0.89</b>                                  | <b>0.00094</b>  |
| LysoPC(14:0)                    | <b>-0.85</b>                            | <b>0.00019</b>  | -0.21                                                 | 0.607435        | <b>1.25</b>                                            | <b>9.09E-07</b> | <b>1.04</b>                                  | <b>1.57E-06</b> |
| LysoPC(16:1)                    | <b>-0.6</b>                             | <b>0.000806</b> | -0.20                                                 | 0.599956        | <b>0.79</b>                                            | <b>0.00027</b>  | <b>0.60</b>                                  | <b>0.000278</b> |
| LysoPE(18:2/0:0)                | <b>-0.52</b>                            | <b>0.002168</b> | -0.20                                                 | 0.360969        | <b>0.61</b>                                            | <b>0.00141</b>  | <b>0.41</b>                                  | <b>0.010696</b> |
| MG(24:6/0:0/0:0)                | <b>-0.39</b>                            | <b>0.0014</b>   | 0.15                                                  | 0.229719        | <b>0.28</b>                                            | <b>0.008309</b> | <b>0.43</b>                                  | <b>0.000181</b> |
| L-Tryptophan                    | <b>-0.32</b>                            | <b>0.011869</b> | 0.02                                                  | 0.605367        | <b>0.30</b>                                            | <b>0.009646</b> | <b>0.32</b>                                  | <b>0.000786</b> |
| L-Histidine                     | <b>-0.47</b>                            | <b>0.000123</b> | 0.19                                                  | 0.196602        | <b>0.37</b>                                            | <b>0.002173</b> | <b>0.57</b>                                  | <b>0.000146</b> |
| p-Salicylic acid                | <b>-1.1</b>                             | <b>0.002942</b> | -0.41                                                 | 0.079453        | <b>1.32</b>                                            | <b>0.005454</b> | <b>0.91</b>                                  | <b>0.020158</b> |
| 12,13-DiHODE                    | <b>-0.74</b>                            | <b>0.000215</b> | -0.19                                                 | 0.233109        | <b>1.02</b>                                            | <b>3.20E-07</b> | <b>0.83</b>                                  | <b>4.01E-05</b> |
| Hypoxanthine                    | <b>0.85</b>                             | <b>0.004392</b> | -0.01                                                 | 0.701204        | <b>-0.84</b>                                           | <b>0.001802</b> | <b>-0.85</b>                                 | <b>0.002082</b> |
| LysoPC(18:1)                    | <b>-0.44</b>                            | <b>0.001012</b> | -0.05                                                 | 0.914828        | 0.25                                                   | 0.2475          | 0.20                                         | 0.139409        |
| 2-Piperidinone                  | <b>-0.61</b>                            | <b>0.004895</b> | -0.14                                                 | 0.882196        | 0.38                                                   | 0.102403        | 0.25                                         | 0.092181        |
| Glycoursodeoxycholic acid       | <b>-1.80</b>                            | <b>0.001835</b> | -0.58                                                 | 0.922145        | 1.17                                                   | 0.194567        | 0.59                                         | 0.139253        |
| Aldosterone                     | <b>-0.58</b>                            | <b>9.51E-05</b> | 0.19                                                  | 0.145546        | -0.24                                                  | 0.640992        | -0.05                                        | 0.434055        |
| Deoxycholic acid                | <b>-1.11</b>                            | <b>0.013663</b> | -1.01                                                 | 0.969167        | 1.46                                                   | 0.605525        | 0.46                                         | 0.405786        |
| N-Undecanoylglycine             | <b>0.32</b>                             | <b>0.021176</b> | 0.06                                                  | 0.84345         | -0.05                                                  | 0.99857         | 0.01                                         | 0.860885        |
| 4-Nitrophenol                   | <b>0.24</b>                             | <b>0.002721</b> | -0.11                                                 | 0.156768        | 0.03                                                   | 0.625363        | -0.08                                        | 0.355364        |
| L-Thyroxine                     | <b>0.25</b>                             | <b>0.006899</b> | -0.05                                                 | 0.971279        | 0.04                                                   | 0.85879         | -0.01                                        | 0.875616        |
| tetracosahexaenoic acid         | <b>-1.86</b>                            | <b>0.003231</b> | 0.12                                                  | 0.183608        | 1.16                                                   | 0.801992        | <b>1.28</b>                                  | <b>0.039796</b> |
| LysoPE(0:0/18:1)                | <b>-0.37</b>                            | <b>0.008377</b> | 0.03                                                  | 0.581991        | 0.28                                                   | 0.154161        | <b>0.31</b>                                  | <b>0.029878</b> |
| Nutriacholic acid               | <b>-0.6</b>                             | <b>0.000338</b> | -0.24                                                 | 0.418741        | 0.87                                                   | 0.064167        | <b>0.63</b>                                  | <b>0.003105</b> |
| $\beta$ -Hydroxyisovaleric acid | <b>0.51</b>                             | <b>0.000563</b> | 0.14                                                  | 0.30018         | <b>-0.38</b>                                           | <b>0.01477</b>  | -0.24                                        | 0.067474        |

<sup>1</sup>Fold change with a positive value indicates that the concentration of certain metabolite is up-regulated in primary EOC patients compared to controls.

<sup>2</sup>Fold change with a positive value indicates that the concentration of certain metabolite is up-regulated in post-operative EOC patients compared to primary EOC patients.

<sup>3</sup>Fold change with a positive value indicates that the concentration of certain metabolite is up-regulated in recurrent EOC patients compared to post-operative EOC patients.

<sup>4</sup>Fold change with a positive value indicates that the concentration of certain metabolite is up-regulated in recurrent EOC patients compared to primary EOC patients.

Welch's t test was performed to determine the statistical significance of metabolite difference between groups, and P values under 0.05 were marked in bold.
